# Supplementary material
Source: Royal Society of Chemistry journal article supplement (doi:10.1039/d6dt00472e)
Supplement: d6dt00472e1.pdf [file d6dt00472e1.pdf]

# Ultralight Heterostructured Aerogels of ZnO/ZnFe<sub>2</sub>O<sub>4</sub>/Fe<sub>3</sub>O<sub>4</sub>/RGO/MWCNT for Ultra-Broadband Microwave Absorption

Farnaz Jamadi<sup>1,2</sup>, Jamileh Seyed-Yazdi<sup>1,\*</sup>, Seyyed Jalal Seyedyazdi<sup>3</sup>

<sup>1</sup>Department of Physics, Faculty of Science, Vali-e-Asr University of Rafsanjan, Rafsanjan, Iran.

<sup>2</sup>Department of Physics, Sirjan University of Technology, Sirjan, Iran.

<sup>3</sup>Department of Computer Science, Vali-e-Asr University of Rafsanjan, Rafsanjan, Iran.

\*Corresponding author: [j.seyedyazdi@gmail.com](mailto:j.seyedyazdi@gmail.com)

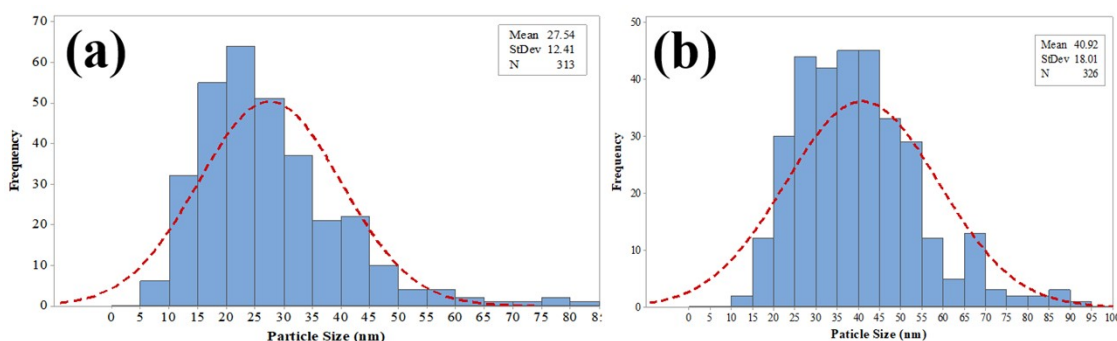

Fig. SI-1. Particle size distributions which demonstrate nearly uniform dispersion of Fe<sub>3</sub>O<sub>4</sub> on the RGO substrate for S<sub>2</sub> (a), and S<sub>3</sub> (b).

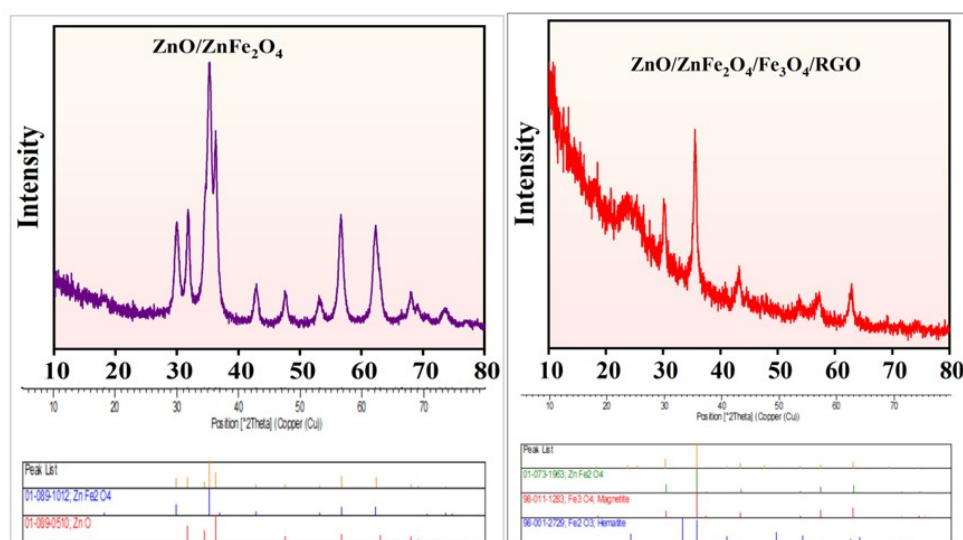

Fig. SI-2. XRD patterns of ZnO/ZnFe<sub>2</sub>O<sub>4</sub> (S<sub>1</sub>), ZnO/ZnFe<sub>2</sub>O<sub>4</sub>/Fe<sub>3</sub>O<sub>4</sub>/RGO (S<sub>2</sub>) samples.

The magnetic response of ferromagnetic materials in high external magnetic fields can be effectively described by the phenomenological law of approach to saturation, commonly expressed as a series expansion, Eq. (1) [s1]:

$$M = M_s \left( 1 - \frac{A}{H} - \frac{B}{H^2} \right) + \chi H \quad (1)$$

Where  $M_s$  is the saturation magnetization, and  $A$ ,  $B$ , and  $\chi$  are constants connected to specific physical phenomena. The parameter  $A$  accounts for effects arising from inclusions and micro-stress within the material,  $B$  correlates with the magneto-crystalline anisotropy, and the term  $\chi H$  represents the forced magnetization induced by high magnetic fields, which becomes particularly relevant at elevated temperatures [s2]. According to established guidelines (Cullity and Graham) [s3], the term involving  $A/H$ , associated with inclusions and micro-stress effects, is typically significant only over limited field ranges and is often regarded as negligible in high-field regimes [s1]. Likewise, the contribution of the  $\chi H$  term is considered negligible because, in high magnetic fields, plotting  $M$  against  $1/H^2$  yields a linear fit with high accuracy. This approach enables the extraction of the saturation magnetization  $M_s$  from the intercepts of the linear fits in the  $M$  versus  $1/H^2$  plots, as demonstrated in Fig. SI-3. Applying Eq. (1), the saturation magnetization values for samples  $S_1$ ,  $S_2$ , and  $S_3$  were determined to be 2.7 emu/g, 13.6 emu/g, and 7.7 emu/g, respectively.

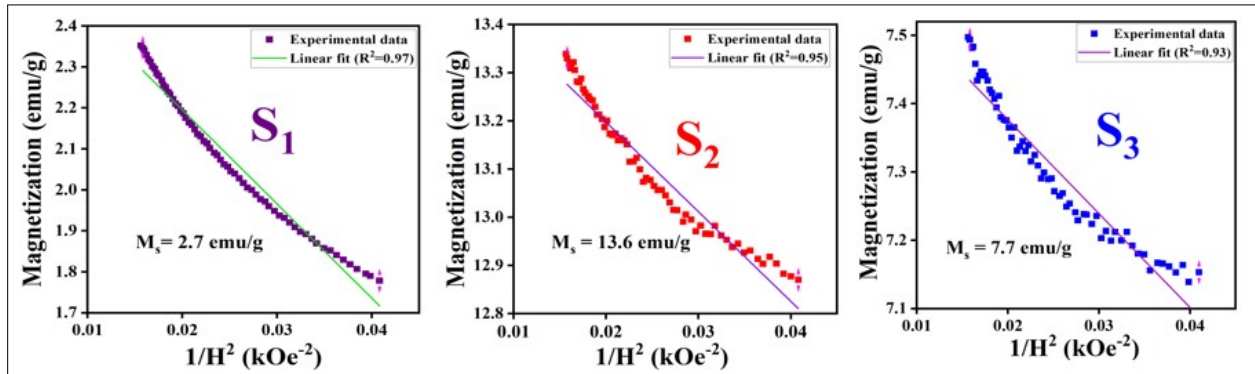

**Fig. SI-3. Magnetization versus  $1/H^2$  for ZnO/ZnFe<sub>2</sub>O<sub>4</sub> (S<sub>1</sub>), ZnO/ZnFe<sub>2</sub>O<sub>4</sub>/Fe<sub>3</sub>O<sub>4</sub>/RGO (S<sub>2</sub>), and ZnO/ZnFe<sub>2</sub>O<sub>4</sub>/Fe<sub>3</sub>O<sub>4</sub>/RGO/MWCNT (S<sub>3</sub>), samples.**

According to the experimental section, sample S2 contains 0.2 g RGO and is measured at 20 wt% filler in paraffin, and sample S3 contains the same 0.2 g RGO plus 0.013 g MWCNTs, but is measured at only 10 wt% filler in paraffin. Therefore, the lower dielectric conductivity of S3 (depicted in Fig. SI-4) is a direct consequence of the reduced overall filler concentration, not an inherent property of MWCNTs. When comparing samples with identical filler loadings (which we are currently preparing for a follow-up study), the inclusion of MWCNTs consistently enhances conductivity and loss.

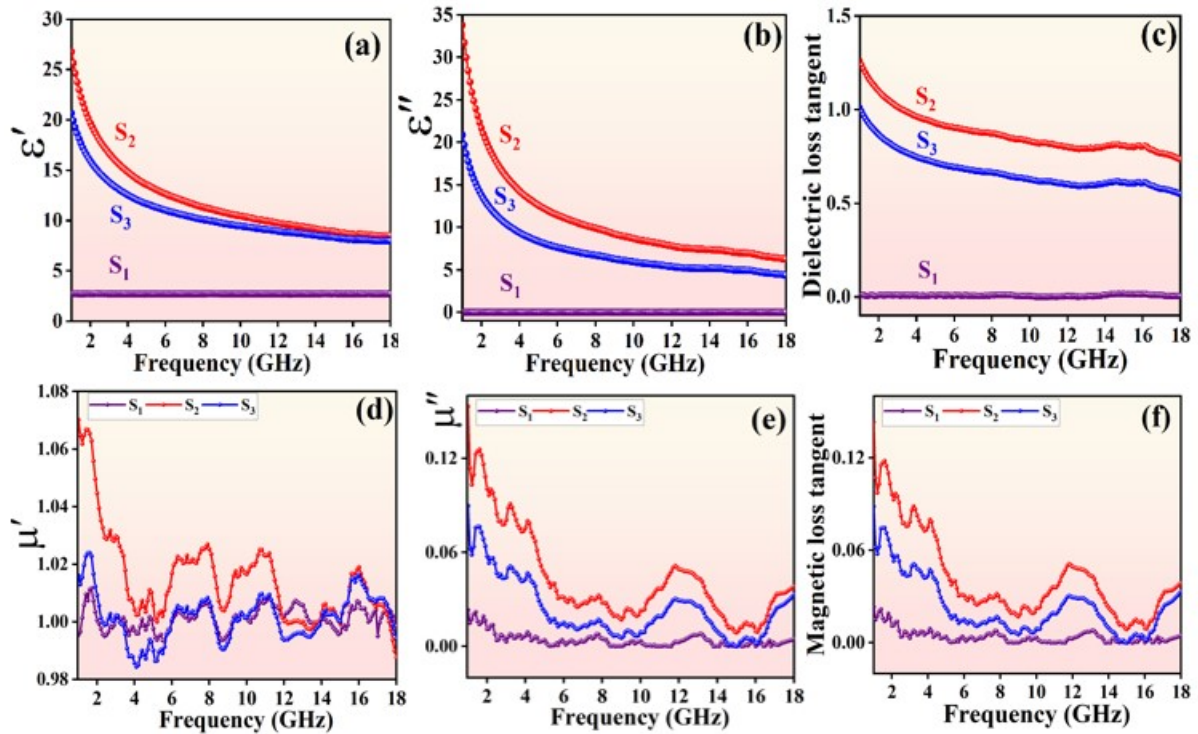

Fig. SI-4. (a,b) real part ( $\epsilon'$ ), and imaginary part ( $\epsilon''$ ) of complex permittivity, (c) dielectric loss tangent, (d,e) real part ( $\mu'$ ) and imaginary part ( $\mu''$ ) of complex permeability, (f) magnetic loss tangent, respectively for ZnO/ZnFe<sub>2</sub>O<sub>4</sub> (S<sub>1</sub>), ZnO/ZnFe<sub>2</sub>O<sub>4</sub>/Fe<sub>3</sub>O<sub>4</sub>/RGO (S<sub>2</sub>), and ZnO/ZnFe<sub>2</sub>O<sub>4</sub>/Fe<sub>3</sub>O<sub>4</sub>/RGO/MWCNT (S<sub>3</sub>), samples.

A direct comparison of RL and EAB values is presented for samples  $S_1$ ,  $S_2$ , and  $S_3$  in Fig. SI-5. The bar charts confirm that the  $S_3$  aerogel achieves both the lowest RL and the widest EAB, representing the most effective and broadband absorber in this study.

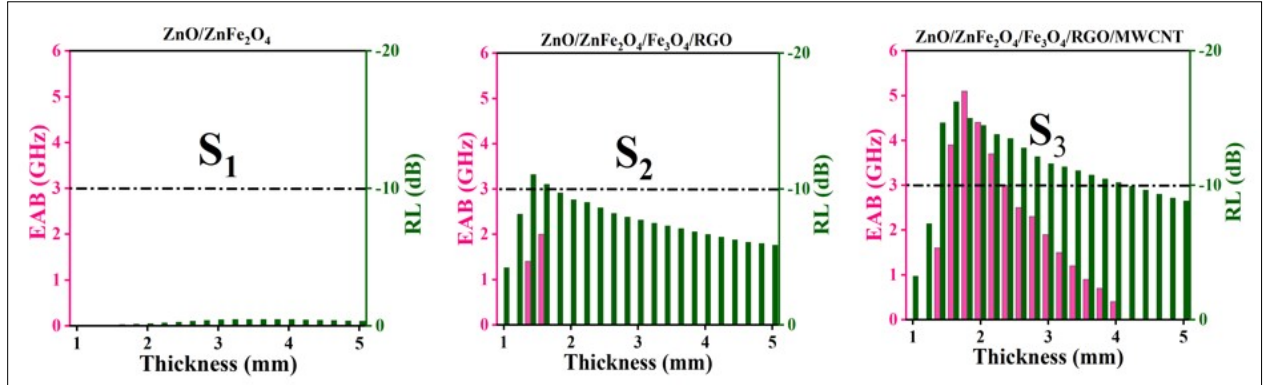

Fig. SI-5. EAB and reflection loss column charts for ZnO/ZnFe<sub>2</sub>O<sub>4</sub> ( $S_1$ ), ZnO/ZnFe<sub>2</sub>O<sub>4</sub>/Fe<sub>3</sub>O<sub>4</sub>/RGO ( $S_2$ ), and ZnO/ZnFe<sub>2</sub>O<sub>4</sub>/Fe<sub>3</sub>O<sub>4</sub>/RGO/MWCNT ( $S_3$ ), samples.

The two-dimensional (2D) and contour diagrams illustrating the coefficient of input impedance matching ( $M_z$ ), are comprehensively presented across all samples in Fig. SI-6. As illustrated, sample  $S_3$  exhibits favorable  $M_z$  values, indicating efficient impedance matching and superior electromagnetic wave absorption compared with samples  $S_1$  and  $S_2$ .

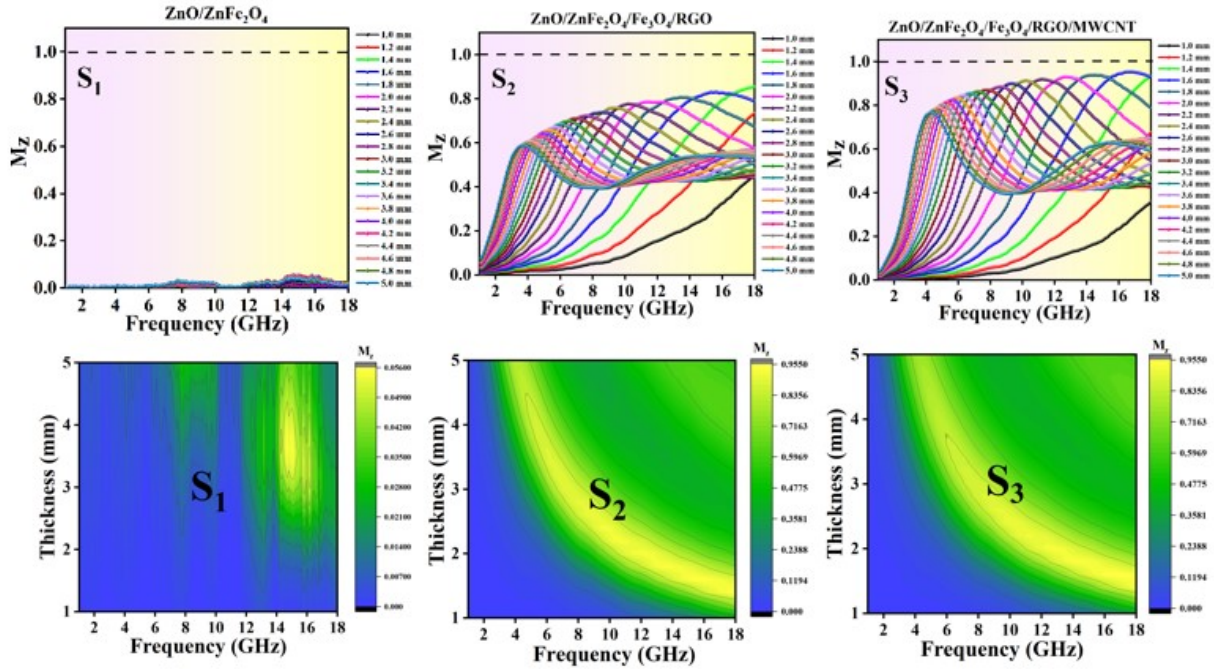

Fig. SI-6. 2D (first row) and contour (second row) diagrams of input impedance matching coefficient for  $\text{ZnO}/\text{ZnFe}_2\text{O}_4$  ( $S_1$ ),  $\text{ZnO}/\text{ZnFe}_2\text{O}_4/\text{Fe}_3\text{O}_4/\text{RGO}$  ( $S_2$ ), and  $\text{ZnO}/\text{ZnFe}_2\text{O}_4/\text{Fe}_3\text{O}_4/\text{RGO}/\text{MWCNT}$  ( $S_3$ ) samples.

The correlation between the real ( $\epsilon'$ ) and imaginary ( $\epsilon''$ ) parts of permittivity is further analyzed using Eq. (2), providing deeper insights into the polarization-relaxation processes.

$$\epsilon' = \frac{1}{2\pi\tau} \frac{\epsilon''}{f} + \epsilon_\infty \quad (2)$$

When dielectric loss is dominated by a polarization-relaxation mechanism, the relaxation time ( $\tau$ ) can be determined by examining the slope of the linear relationship between  $\epsilon'$  and  $\epsilon''/f$ , as depicted in Fig. SI-7. Variations in this slope reflect the dynamics of dipole orientation. Fitting three linear

segments reveals multiple relaxation processes influencing dielectric loss and microwave absorption [s4]. As seen in Fig. SI-7, the relaxation time of the S<sub>2</sub> sample is longer than that of the S<sub>3</sub> sample.

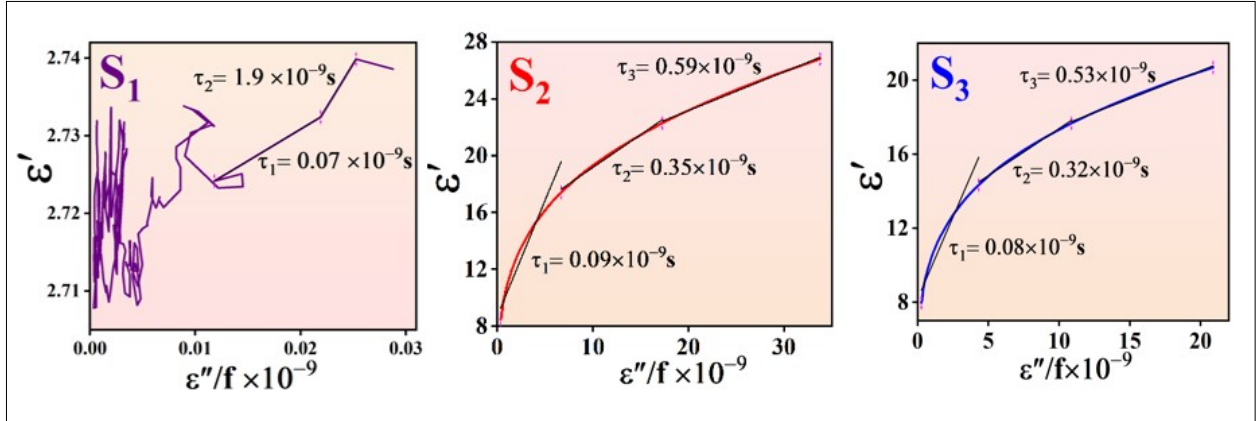

**Fig. SI-7. The  $\epsilon''$  versus  $\epsilon''/f$  diagrams for ZnO/ZnFe<sub>2</sub>O<sub>4</sub> (S<sub>1</sub>), ZnO/ZnFe<sub>2</sub>O<sub>4</sub>/Fe<sub>3</sub>O<sub>4</sub>/RGO (S<sub>2</sub>), and ZnO/ZnFe<sub>2</sub>O<sub>4</sub>/Fe<sub>3</sub>O<sub>4</sub>/RGO/MWCNT (S<sub>3</sub>), samples.**

## References

- [s1] Suliga, M. and K. Chwastek, Effect of stress in drawn wires on magnetization curves in the saturation region. *Acta Physica Polonica A*, 2019. **135**(2): p. 243-245.
- [s2] Awawdeh, M., I. Bsoul, and S. Mahmood, Magnetic properties and Mössbauer spectroscopy on Ga, Al, and Cr substituted hexaferrites. *Journal of Alloys and Compounds*, 2014. **585**: p. 465-473.
- [s3] Cullity, B.D. and C.D. Graham, *Introduction to magnetic materials*. 2011: John Wiley & Sons.
- [s4] Zhou, X., et al., Electromagnetic wave absorption performance of NiCo<sub>2</sub>X<sub>4</sub> (X= O, S, Se, Te) spinel structures. *Chemical Engineering Journal*, 2021. **420**: p. 129907.
